# Supplementary material for: Rare examples of hybrid chalcogenoarsenate(iii) incorporating trivalent vanadium complexes
Source: Royal Society of Chemistry journal article supplement (doi:10.1039/d2dt00251e), 2022-01-01
Supplement: d2dt00251e1.pdf [file d2dt00251e1.pdf]

## Supporting information

### The infrequent example of hybrid chalcogenoarsenates(III) incorporating trivalent vanadium complexes

Shuping Duan,<sup>a</sup> Ya Xu,<sup>a</sup> Jian Zhou,<sup>\*a</sup> Zunhong Xiao<sup>\*b</sup> and Hua-Hong Zou<sup>\*c</sup>

<sup>a</sup>Chongqing Key Laboratory of Inorganic Functional Materials, College of Chemistry, Chongqing Normal University, Chongqing 401331, P. R. China

<sup>b</sup>School of Chemistry and Materials, Guizhou Normal University, Guiyang, Guizhou 550025, P. R. China

<sup>c</sup>Key Laboratory for the Chemistry and Molecular Engineering of Medicinal Resources (Ministry of Education of China), School of Chemistry and Chemical Engineering of Guangxi Normal University, Guilin 541004, P.R. China.

#### Electrochemical characterizations

The working electrodes for photocurrent measurements were prepared by following processes. 8 mg of microcrystal sample was dispersed into a mixed solution of ethanol (2 mL) and Nafion (50  $\mu\text{L}$ ), followed by ultrasonic treatment for 0.5 h. Then, 120  $\mu\text{L}$  of the above slurry was coated onto the FTO glass (F-doped  $\text{SnO}_2$ ) with an effective area of 1  $\text{cm}^2$  and dried naturally at room temperature. The photocurrent experiment was performed on a CHI760E electrochemistry workstation in a three-electrode system, with the sample coated FTO glass as the working electrode, a Pt slice as the auxiliary electrode and an Ag/AgCl as the reference electrode. The supporting electrolyte solution was 0.5  $\text{mol}\cdot\text{L}^{-1}$   $\text{Na}_2\text{SO}_4$  aqueous solution (40 mL). A 450 W high pressure Xe lamp with 420 nm was used as the illumination source. The lamp was

kept on continuously, and a manual shutter was used to block exposure of the sample to the light. The sample was typically irradiated at intervals of 50 s. Electrochemical impedance spectroscopy (EIS) was made in a frequency ranging from  $10^5$  Hz to 0.01 Hz. The experimental data were fitted with the equivalent circuit diagram by ZSimpWin software, where  $R_s$  is the solution resistance, CPE is the constant phase element, and  $R_{ct}$  is the charge transfer resistance.

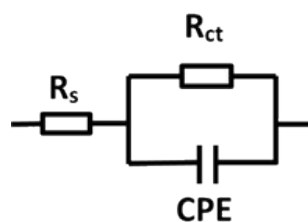

The equivalent circuit diagram

Table S1  $R_s$ , CPE, and  $R_{ct}$  values of **1-5**.

| Compound | visible-light or Without | $R_s(\Omega)/\text{error}(\%)$ | CPE(S-sec <sup>n</sup> )/error (%) | Freq power/error (%) | $R_{ct}(\Omega)/\text{error}(\%)$ |
|----------|--------------------------|--------------------------------|------------------------------------|----------------------|-----------------------------------|
| 1        | visible-light            | 27.69/0.90                     | $5.25 \times 10^{-5}/1.19$         | 0.89/0.31            | $4.41 \times 10^4/1.71$           |
|          | Without visible-light    | 27.61/0.75                     | $5.66 \times 10^{-5}/0.93$         | 0.89/0.25            | $5.37 \times 10^4/1.55$           |
| 2        | visible-light            | 25.16/1.34                     | $6.56 \times 10^{-5}/1.63$         | 0.88/0.60            | $2.05 \times 10^4/1.63$           |

|   |                              |            |                            |           |                         |
|---|------------------------------|------------|----------------------------|-----------|-------------------------|
|   | Without<br>visible-<br>light | 25.70/0.74 | $6.88 \times 10^{-5}/0.87$ | 0.82/0.24 | $4.87 \times 10^4/1.63$ |
|   | visible-<br>light            | 28.53/1.17 | $4.77 \times 10^{-5}/1.28$ | 0.82/0.35 | $8.62 \times 10^4/2.73$ |
| 3 | Without<br>visible-<br>light | 28.27/1.19 | $5.05 \times 10^{-5}/1.28$ | 0.83/0.35 | $9.95 \times 10^4/3.08$ |
|   | visible-<br>light            | 22.72/0.64 | $7.26 \times 10^{-5}/0.94$ | 0.86/0.24 | $1.77 \times 10^4/1.03$ |
| 4 | Without<br>visible-<br>light | 22.75/0.98 | $7.03 \times 10^{-5}/1.31$ | 0.87/0.34 | $3.04 \times 10^4/1.91$ |
|   | visible-<br>light            | 21.47/0.77 | $5.52 \times 10^{-5}/1.12$ | 0.89/0.27 | $2.21 \times 10^4/1.20$ |
| 5 | Without<br>visible-<br>light | 21.56/0.96 | $5.24 \times 10^{-5}/1.23$ | 0.88/0.32 | $3.82 \times 10^4/1.81$ |

---

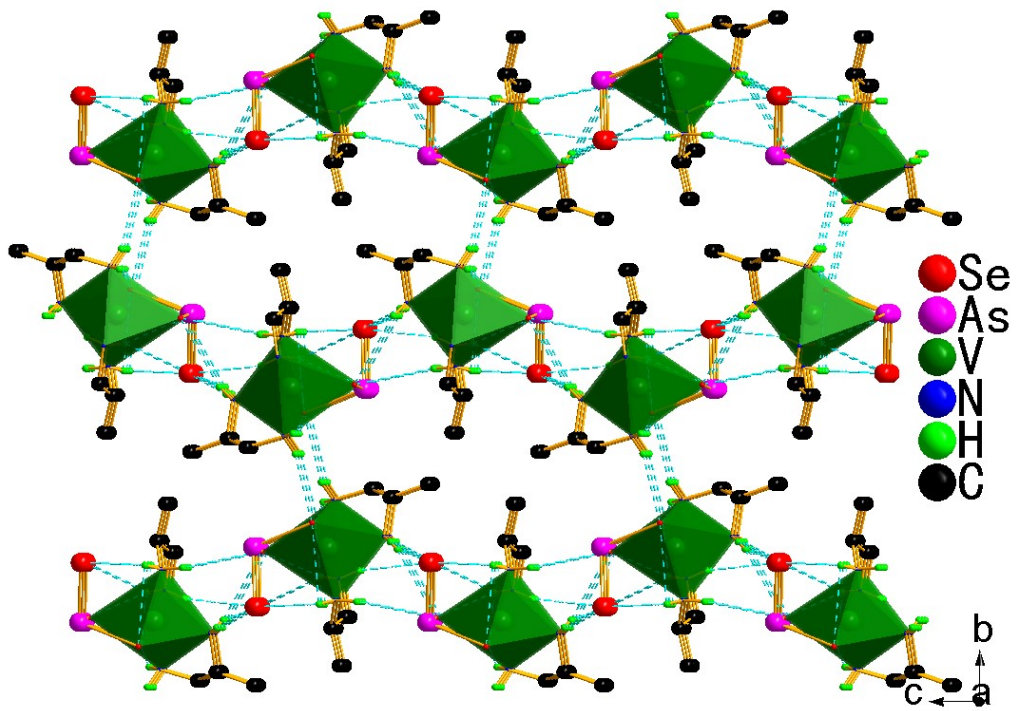

Fig. S1 3-D H-bonding network structure of 2.

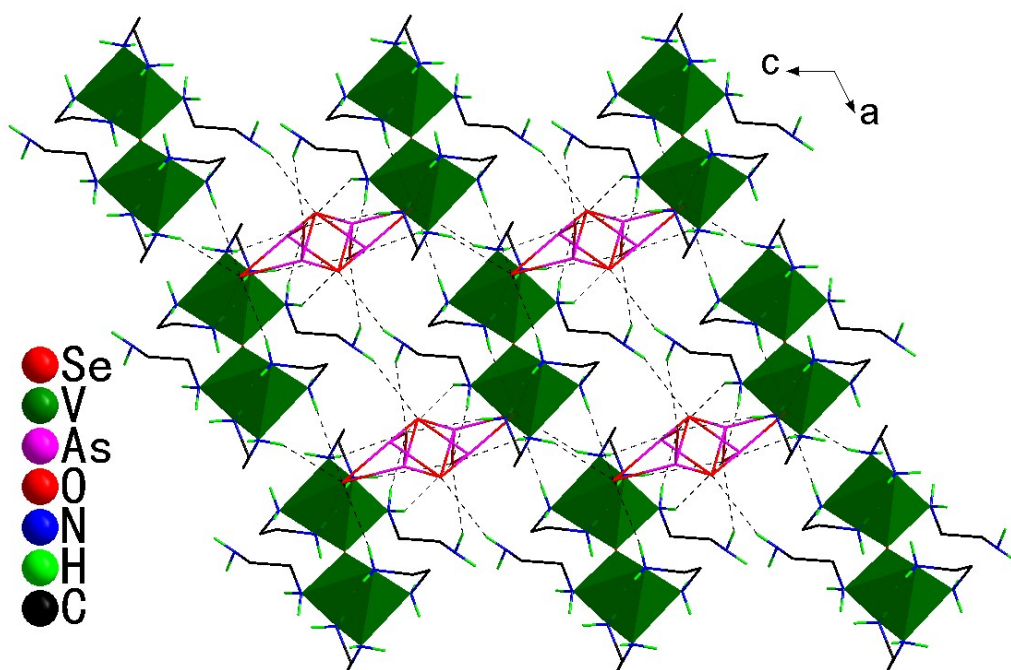

Fig. S2 the 3-D H-bonding network structure in 5.

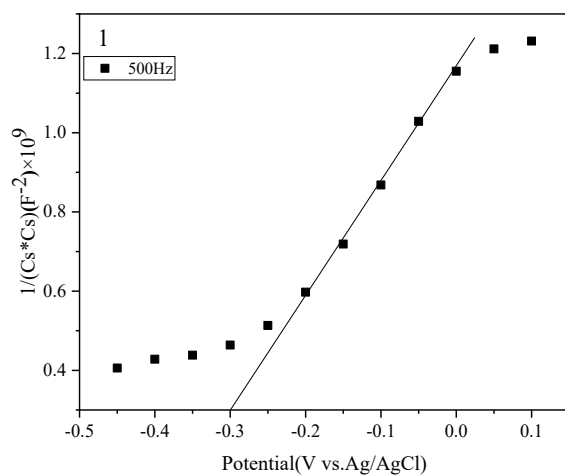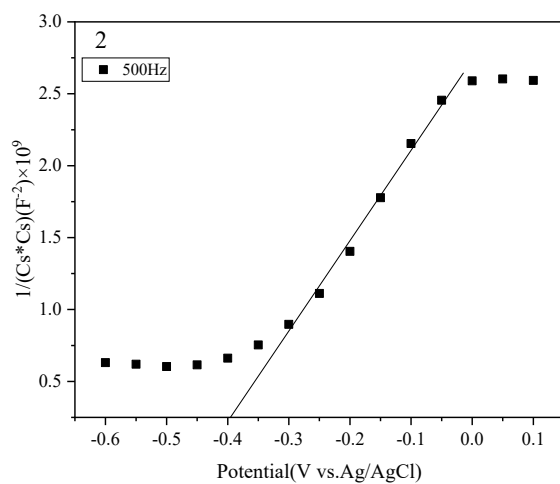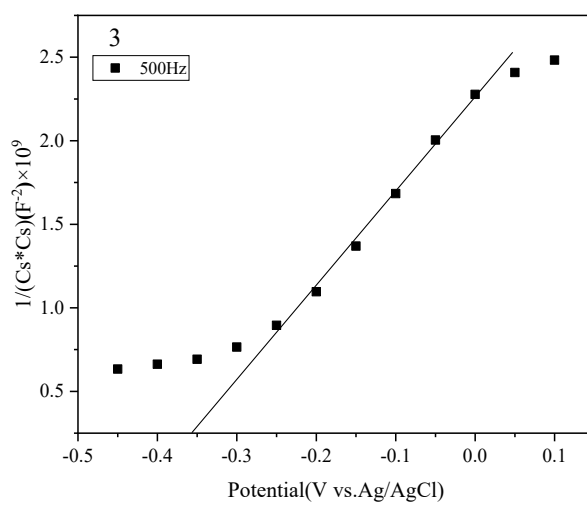

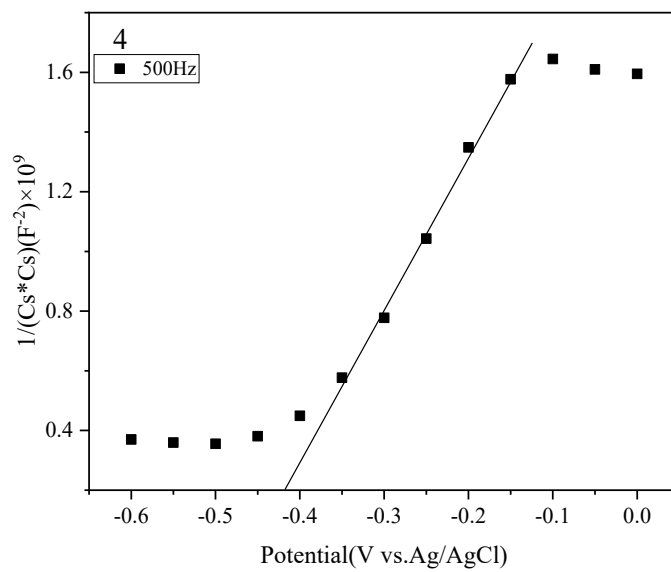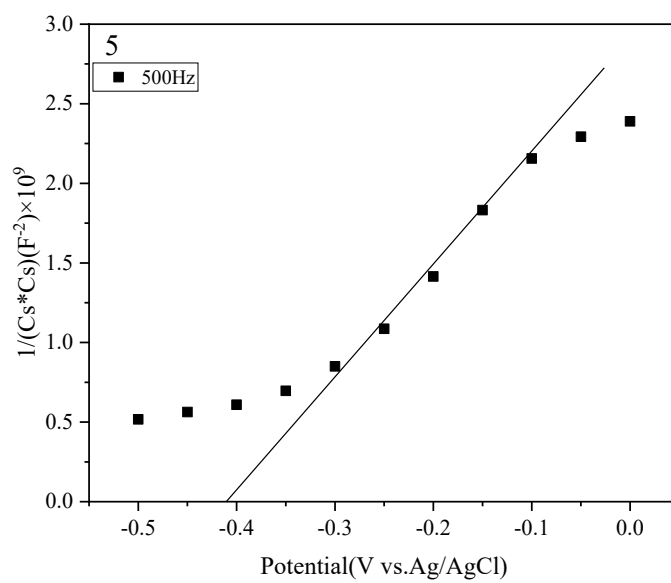

**Fig. S3** Mott-Schottky plots of 1-5.

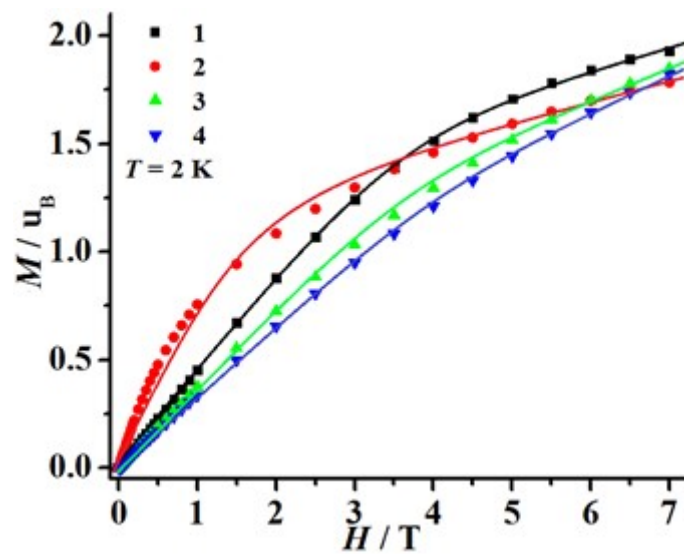

Fig. S4.  $M$ - $H$  for 1-4 at 2 K and best fit (solid lines).

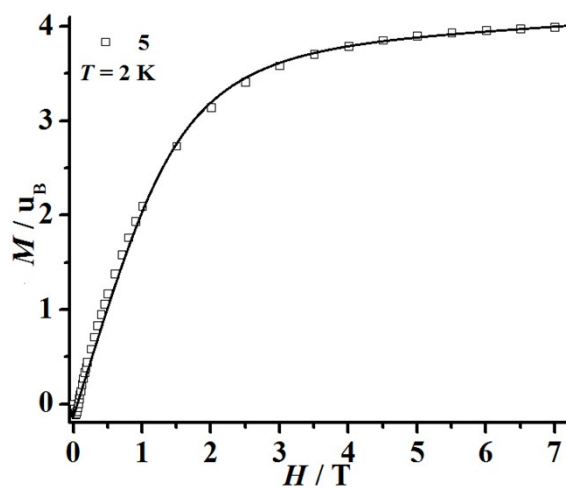

Fig. S5.  $M$ - $H$  for 5 at 2 K and best fit (solid lines).

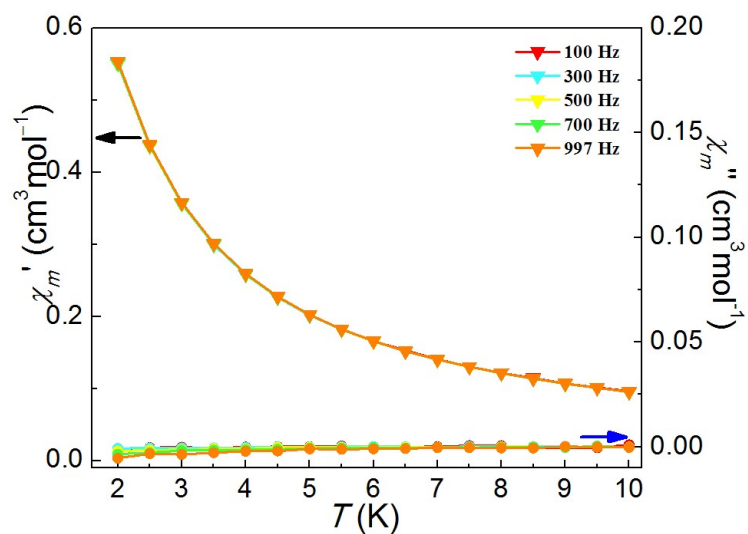

Fig. S6. Temperature-dependent  $\chi'$  and  $\chi''$  AC susceptibilities under 0 Oe DC fields for 5.

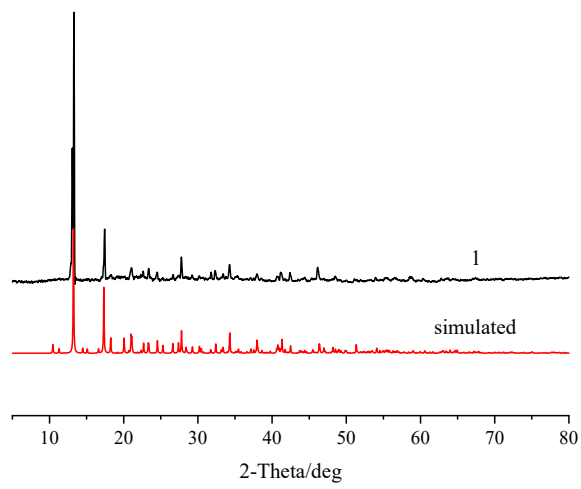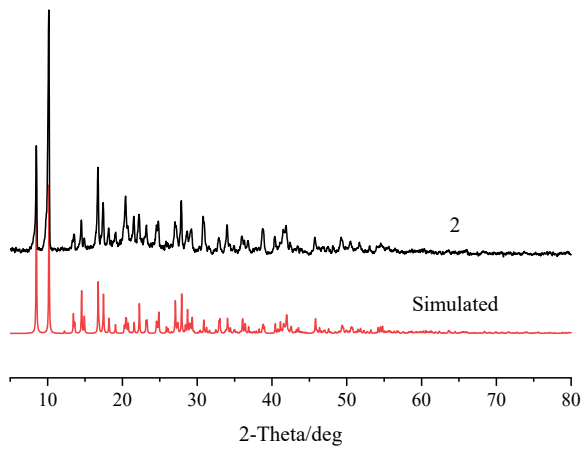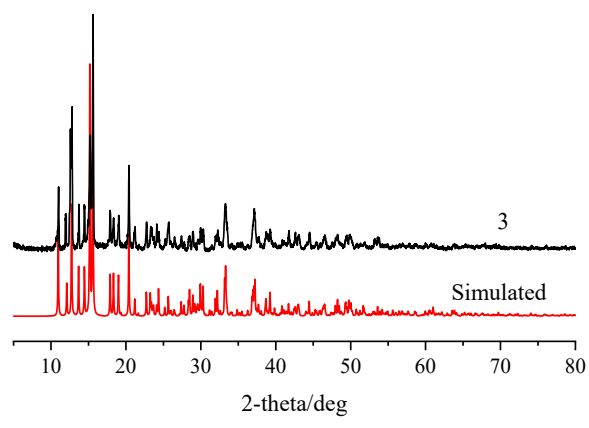



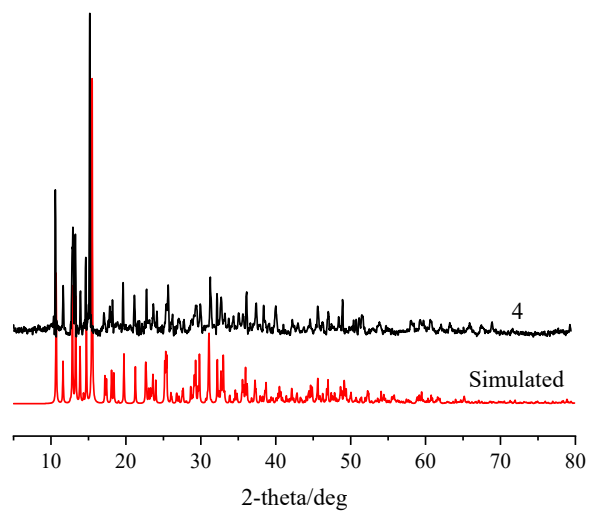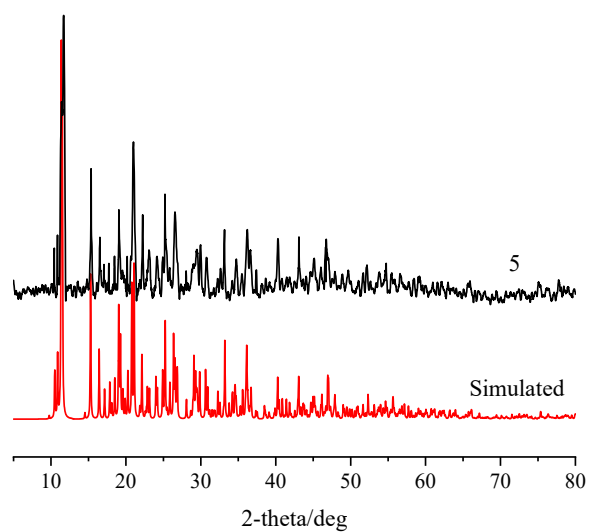

**Fig. S7** Simulated, experimental and after immersed XRD patterns of 1-5.

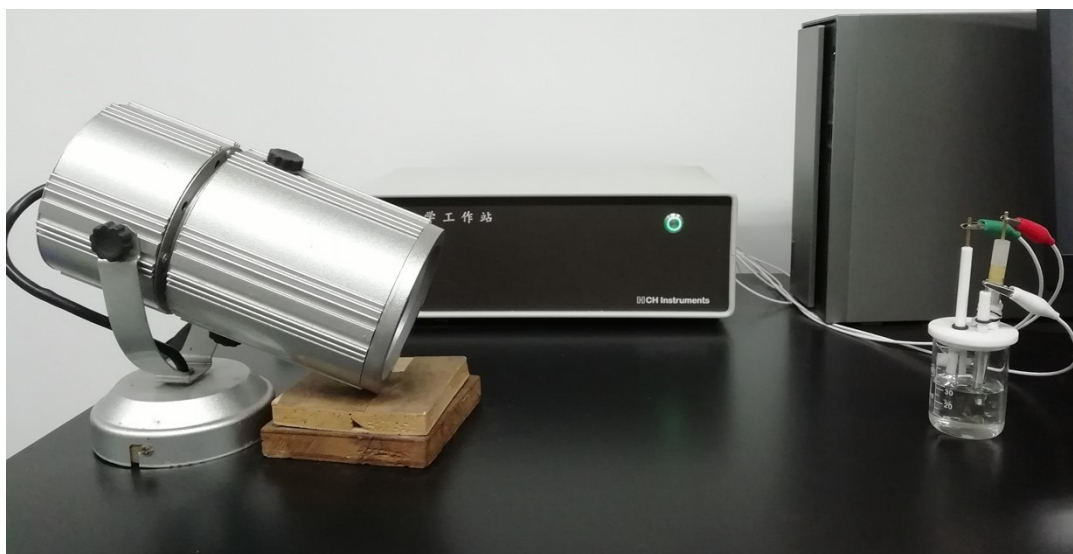

Fig. S8 the three-electrode system and the photoelectric properties measurement setup

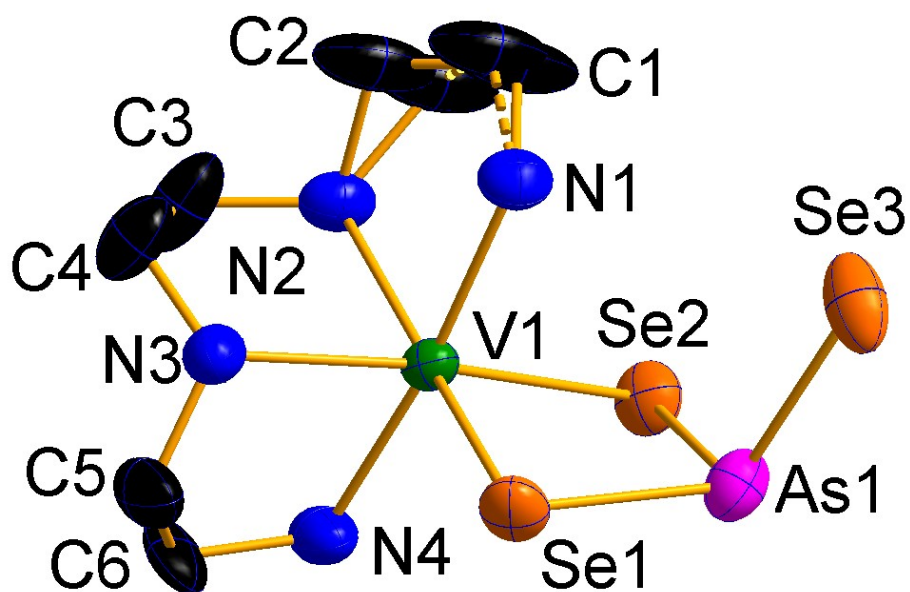

Fig. S9 The crystal structure of **4**. All H atoms bonded to C and N atoms are omitted for clarity.
